# Supplementary material
Source: publisher site journal article supplement (https://www.dovepress.com/article/582833)
Supplement: Supplementary file 1 [file supplementary%20materials_1.docx]

**Supplementary Figure 1**

**Schematic illustration of morphometric similarity network (MSN) construction.**


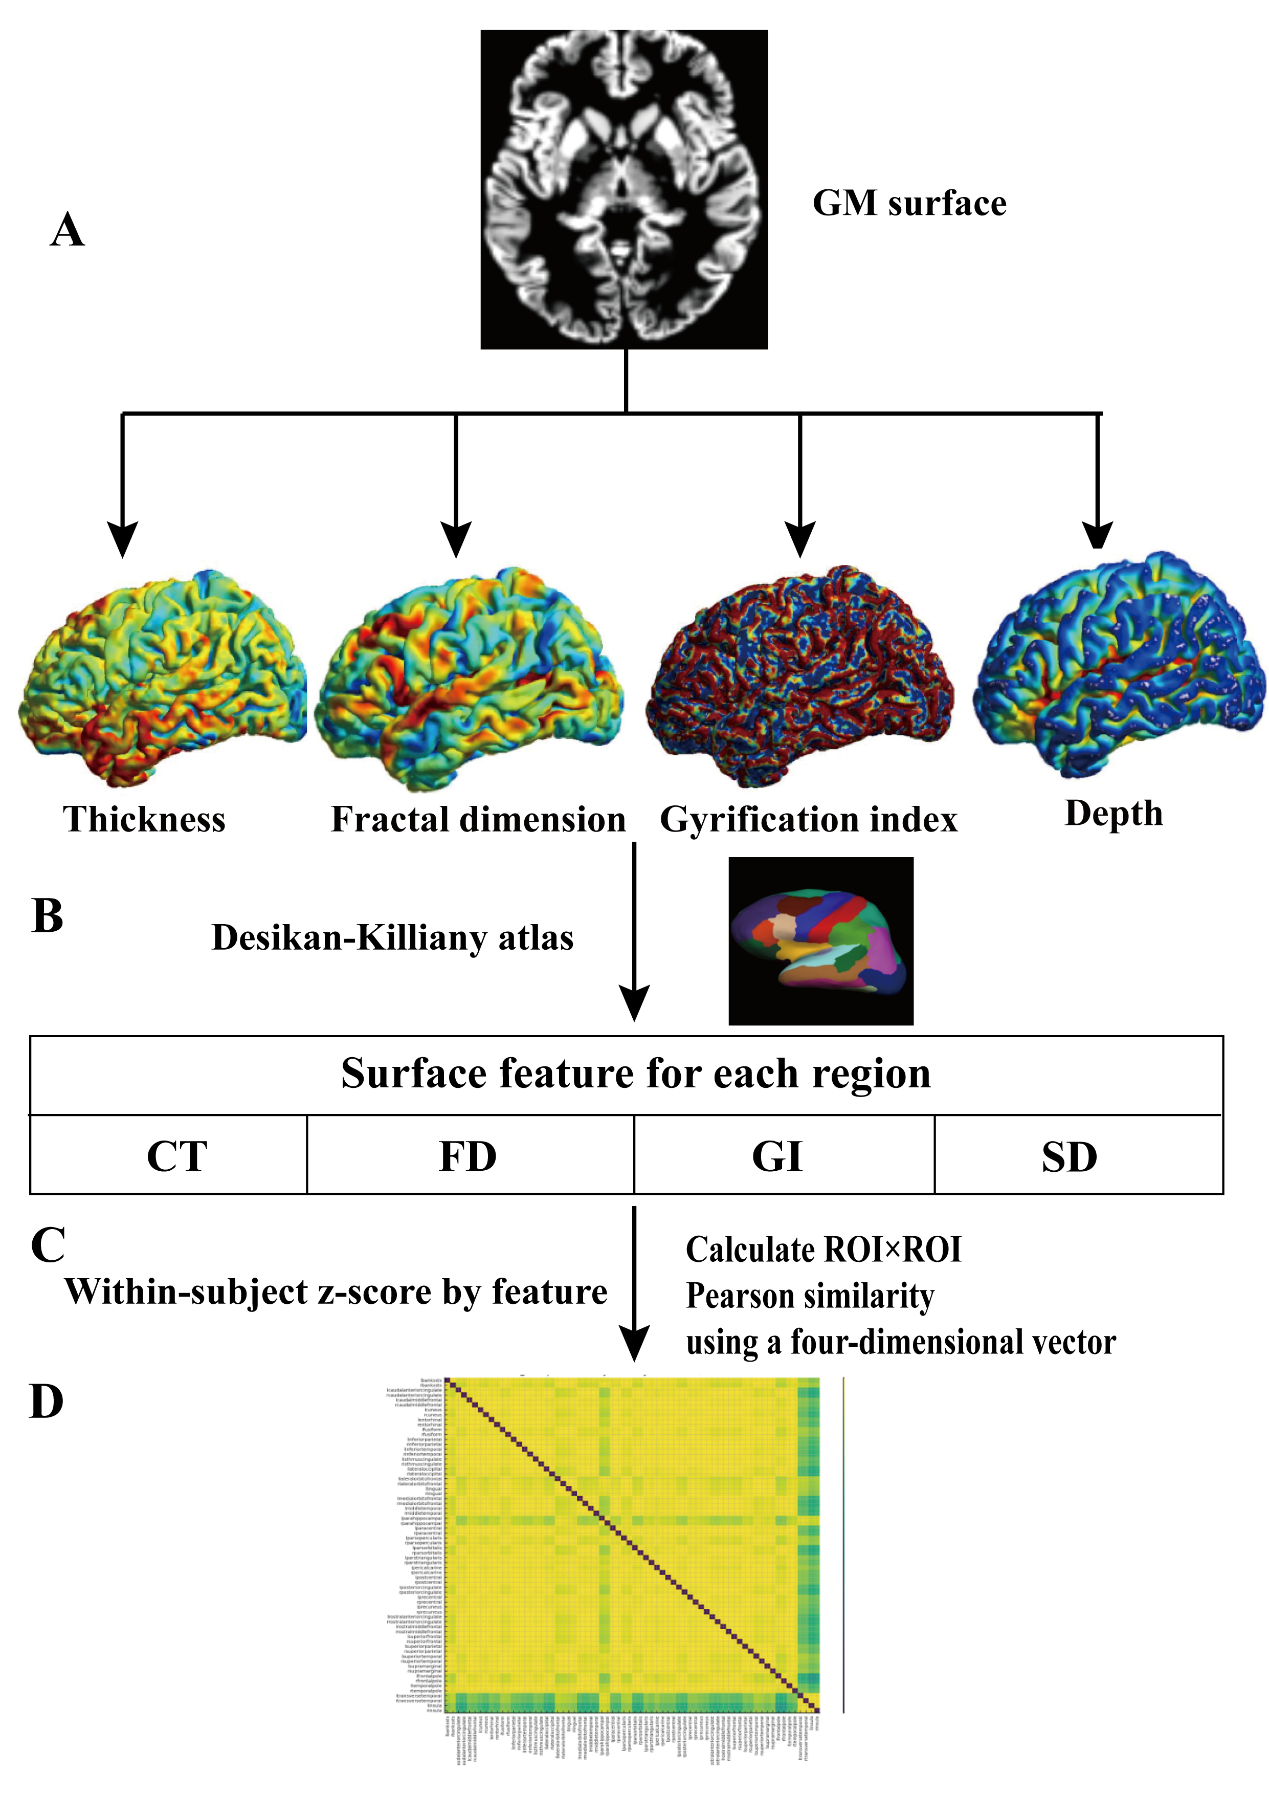


(A) Structural MRI data were processed with CAT12 to reconstruct cortical surfaces. Four morphometric features were extracted for each subject: cortical thickness (CT), fractal dimension (FD), gyrification index (GI), and sulcal depth (SD).
(B) All features were mapped to the Desikan–Killiany atlas (68 cortical regions), resulting in a subject-specific feature matrix of 68 × 4.
(C) For each subject, features were normalized within-subject (z-scored across regions) to reduce inter-feature scaling differences.
(D) Morphometric similarity between each pair of cortical regions was computed as the Pearson correlation between their four-dimensional feature vectors, yielding a 68 × 68 subject-level MSN adjacency matrix.

**Supplementary Table 1**

**Cluster-wise report of gray-matter differences (with peak MNI and dominant**

| **Label** | **Cluster Size** | **T** | **Coordinates** | | |
| --- | --- | --- | --- | --- | --- |
| **x** | **y** | **z** |
| Left Fusiform | 9359 | 6.11 | -6 | -4.5 | -9 |
| Right Fusiform | 1185 | 4.74 | 42 | -69 | -19.5 |
| Right Rectus | 881 | 4.32 | 10.5 | 28.5 | -19.5 |
| Left Calcarine | 4641 | 5.09 | 0 | -78 | -6 |
| Left Angular | 898 | 5.19 | -40.5 | -69 | 52.5 |

**anatomical labels)**

Reported are cluster size (voxels), peak t statistic, and peak MNI coordinates (mm), with representative anatomical labels (AAL), from the discovery-cohort analysis. Group comparisons were performed with age, sex and TIV included as covariates. All clusters survived cluster-level FWE correction at p < 0.05 (voxel-wise threshold p < 0.001, minimum extent ≥ 50 voxels).

**Supplementary Figure 2**

**Voxel-based morphometry results in the discovery cohort (stratified VBM analyses)**


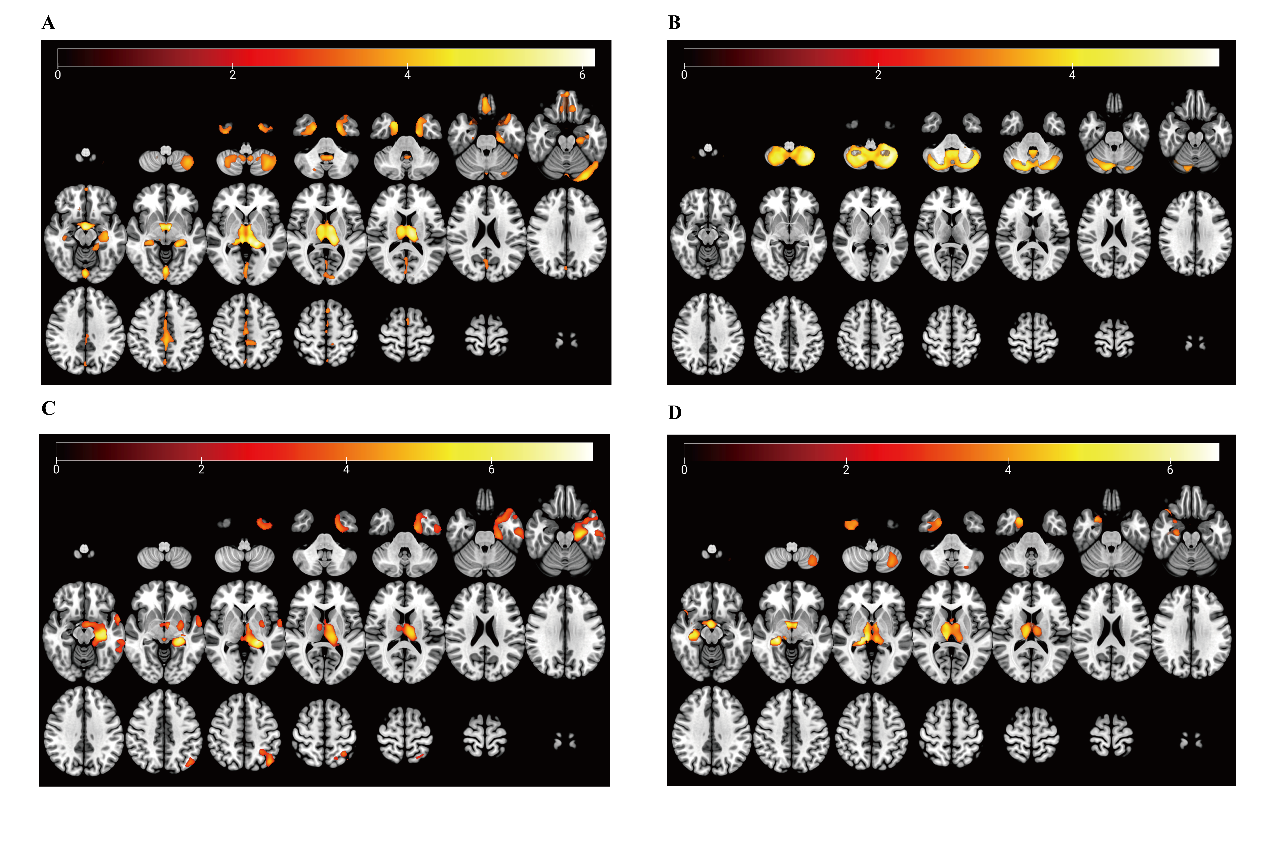
Axial slice overlays of brain regions showing significant gray matter (GM) volume differences in the discovery cohort, based on voxel-wise two-sample t-tests in SPM12. All models included age, sex, and TIV as covariates. Statistical maps were thresholded at p < 0.05, cluster-level family-wise error (FWE) correction (whole-brain). Panels show subtype-stratified contrasts: (A) TLE vs HC, (B) non-TLE vs HC, (C) left TLE vs HC, and (D) right TLE vs HC. Significant clusters were predominantly observed in temporo-limbic/ventral temporal territories, with additional subgroup-specific involvement in extra-temporal regions. The color bar represents T values (higher values indicate stronger between-group effects).

**Supplementary Table 2**

**Significant clusters of gray matter volume reduction in the discovery cohort** **(stratified VBM analyses)**

| **Contrast** | **Cluster ID** | **Cluster size** | **Peak T** | **Coordinates** | | | **Label** |
| --- | --- | --- | --- | --- | --- | --- | --- |
| **x** | **y** | **z** |
| non-TLE vs HC | 1 | 20010 | 5.53 | -37.5 | -61.5 | -48 | Left Cerebelum lobule VIIb |
| TLE vs HC | 1 | 2435 | 4.22 | -37.5 | -60 | -51 | Left Cerebelum lobule VIII |
|  | 2 | 1597 | 4.28 | -9 | -52.5 | -45 | Left Cerebelum lobule IX |
|  | 3 | 1994 | 4.83 | 19.5 | 10.5 | -33 | Right Fusiform |
|  | 4 | 13034 | 6.27 | -9 | -4.5 | -7.5 | Left Thalamus |
|  | 5 | 1749 | 4.36 | 3 | 45 | -27 | Left Rectus |
|  | 6 | 4216 | 4.88 | 1.5 | -87 | -16.5 | Righ Cerebelum lobule VIII |
|  | 7 | 2648 | 4.20 | -1.5 | -34.5 | 45 | Left mid cingulate gyrus |
| Left TLE vs HC | 1 | 14562 | 7.44 | -24 | -31.5 | -1.5 | Left Thalamus |
|  | 2 | 1497 | 4.10 | -58.5 | -15 | -27 | Left inferior temporal gyrus |
|  | 3 | 1560 | 5.13 | -40.5 | -67.5 | 54 | Left inferior parietal lobule |
| Right TLE vs HC | 1 | 1610 | 4.17 | -33 | -69 | -48 | Left Cerebelum lobule VIII |
|  | 2 | 2484 | 4.92 | 21 | 10.5 | -33 | Right Fusiform |
|  | 3 | 7661 | 6.69 | 25.5 | -28.5 | -4.5 | Left Thalamus |

Reported are cluster size (voxels), peak t statistic, and peak MNI coordinates, with representative anatomical labels (AAL). Results are from voxel-wise two-sample t-tests in the discovery cohort, with age, sex, and TIV included as covariates in all models. All clusters survive cluster-level FWE correction at p < 0.05 (voxel-wise threshold p < 0.001, minimum extent ≥ 50 voxels).

**Supplementary Figure 3**

**Voxel-based morphometry results in the validation cohort.**

**
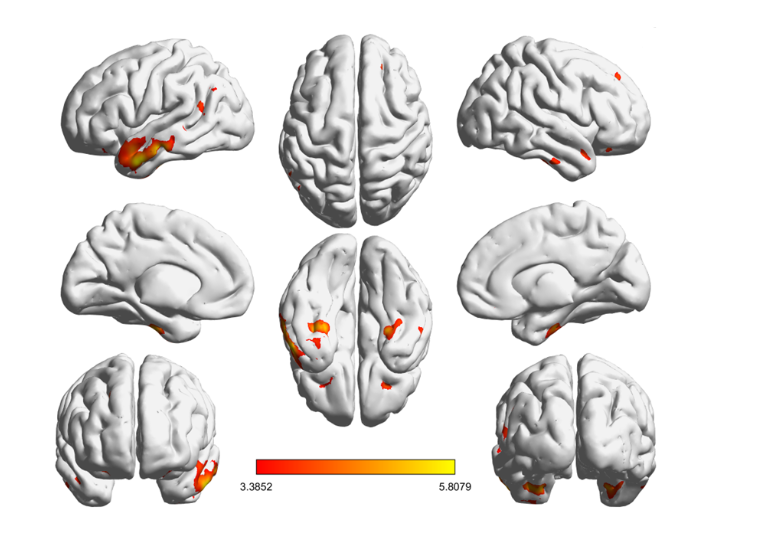
**

Surface rendering of brain regions showing significant gray matter volume differences in the validation dataset, thresholded at *p* < 0.05, cluster-level family-wise error (FWE) correction. All models included age, sex, and TIV as covariates. Significant clusters were mainly located in the bilateral temporal lobes (including middle/inferior temporal gyri, fusiform gyrus, parahippocampal gyrus, and temporal poles), as well as the left angular gyrus and right frontal regions. The color bar represents T values (range: 3.39–5.81).

**Supplementary Table 3**

**Significant clusters of gray matter volume reduction in the validation cohort**

| **Label** | **Cluster Size** | **T** | **Coordinates** | | | **Overlap Exploration** |
| --- | --- | --- | --- | --- | --- | --- |
| **x** | **y** | **z** |
| Left Middle Temporal Gyrus | 5953 | 5.81 | -55.5 | 1.5 | -30 | Y |
| Right Parahippocampal | 715 | 5.71 | 27 | -18 | -36 | Y |
| Right Inferior Temporal Gyrus | 208 | 4.26 | 55.5 | -13.5 | -31.5 | Y |
| Right Temporal Pole | 449 | 4.68 | 46.5 | 10.5 | -24 | Y |
| Left Inferior Frontal Gyrus, orbital part | 328 | 3.99 | -21 | 24 | -21 | N |
| Right Superior Frontal Gyrus, orbital part | 423 | 4.71 | 21 | 31.5 | -16.5 | N |

The table lists significant clusters identified in the validation dataset using voxel-based morphometry, thresholded at p < 0.05 with cluster-level family-wise error (FWE) correction. Group comparisons were performed with age, sex, and TIV included as covariates. For each cluster, the peak MNI coordinates (x, y, z), cluster size, maximum T value, and principal anatomical label are reported. The final column indicates whether the identified region overlaps with significant findings from the discovery cohort (“Y” = overlap; “N” = no overlap).

**Supplementary Figure 4**

**Voxel-based morphometry results in the validation cohort (stratified VBM analyses)**


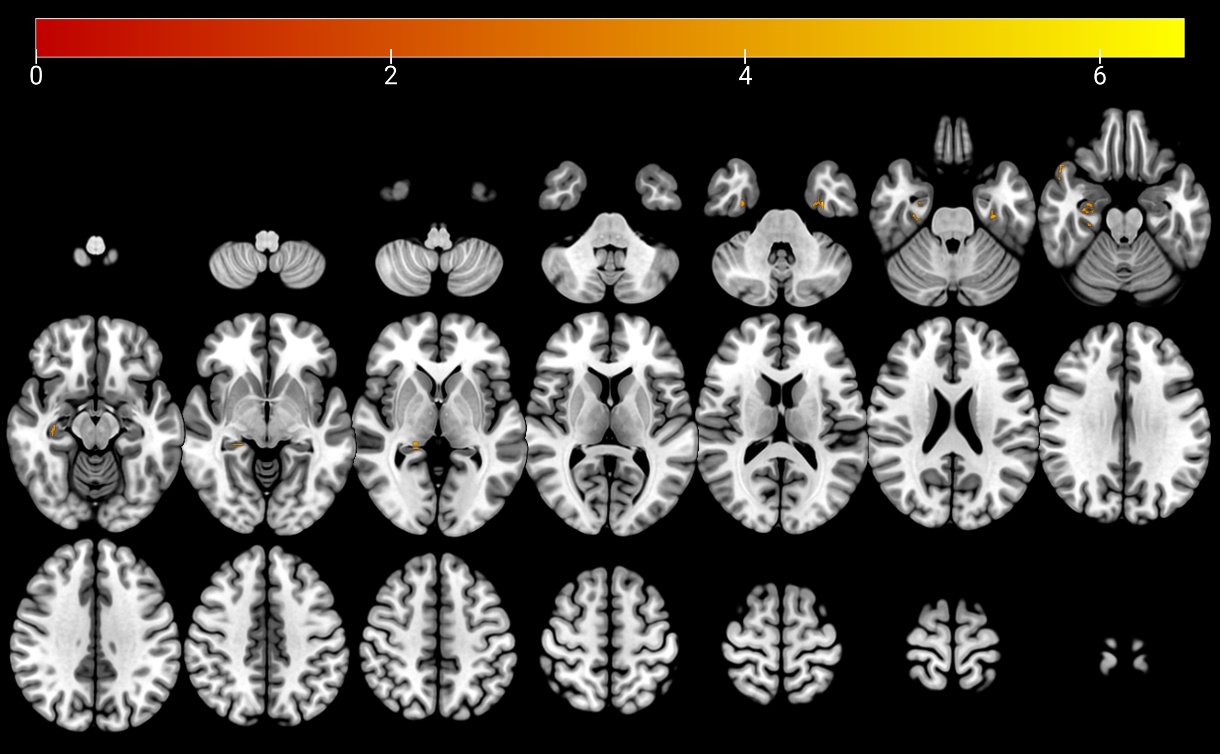


Axial slice overlays of brain regions showing significant GM volume differences in the validation cohort for the TLE vs HC comparison, based on voxel-wise two-sample t-tests in SPM12. All models included age, sex, and TIV as covariates. Statistical maps were thresholded at p < 0.05, cluster-level family-wise error (FWE) correction (whole-brain). The color bar represents T values (higher values indicate stronger between-group effects).

**Supplementary Table 4**

**Significant clusters of gray matter volume reduction in the validation cohort (stratified VBM analyses)**

| **Contrast** | **Cluster ID** | **Cluster size** | **Peak T** | **Coordinates** | | | **Label** |
| --- | --- | --- | --- | --- | --- | --- | --- |
| **x** | **y** | **z** |
| TLE vs HC | 1 | 146 | 6.90 | -31.5 | -10.5 | -31.5 | Left Fusiform |
|  | 2 | 91 | 5.05 | 31.5 | -7.5 | -37.5 | Right ParaHippocampal |
|  | 3 | 152 | 4.94 | 27 | -15 | -25.5 | Right Hippocampus |
|  | 4 | 52 | 6.00 | 49.5 | 18 | -25.5 | Right Superior Temporal Pole |
|  | 5 | 72 | 4.71 | 18 | -33 | -1.5 | Right Hippocampus |

Reported are cluster size (voxels), peak t statistic, and peak MNI coordinates, with representative anatomical labels (AAL). Results are from voxel-wise two-sample t-tests in the validation cohort. Age, sex and TIV included as covariates in all models. All clusters survive cluster-level FWE correction at p < 0.05 (voxel-wise threshold p < 0.001, minimum extent ≥ 50 voxels).

**Supplementary Figure 5**

**Group comparison of regional MSN metrics in the validation cohort.**


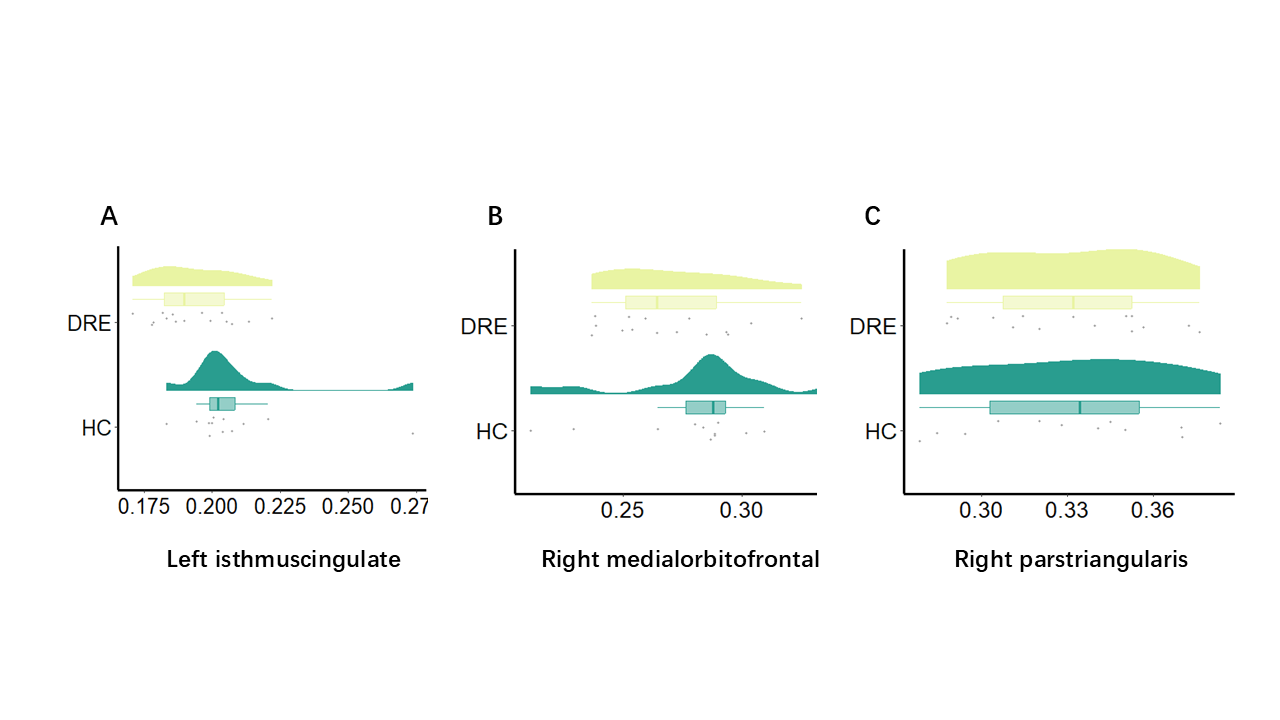


(A–C) Distributions for the left isthmus cingulate, right medial orbitofrontal, and right pars triangularis in the validation cohort. Group comparisons were conducted using HC3-robust linear models with age and sex included as covariates, with two-sided testing and FDR correction (two-sided). The effect directions were consistent with the exploration cohort, showing lower regional meanMS in DRE relative to HC; however, none of the three parcels reached statistical significance (q > 0.05). These findings highlight directional concordance across datasets, albeit without statistical replication in independent cohort.

**Supplementary Figure 6**

**TLE vs HC comparison of regional MSN metrics in the discovery cohort**


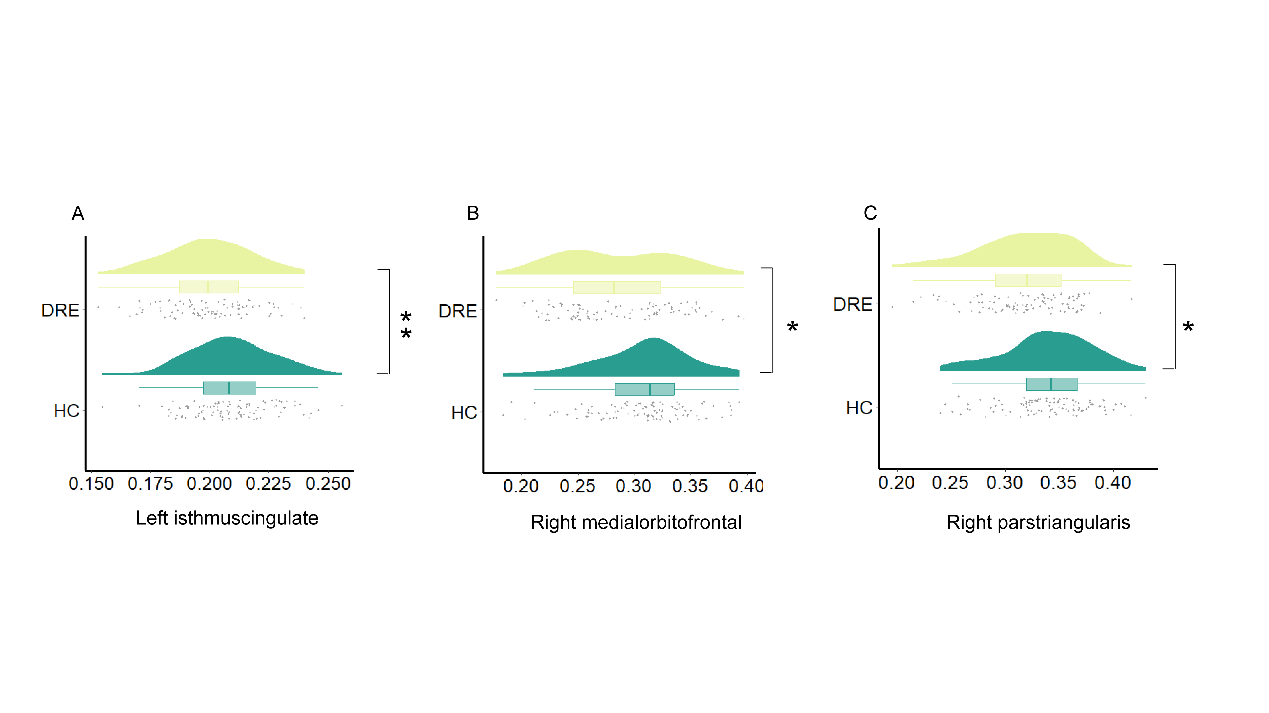


Notes: Distributions for the left isthmus cingulate, right medial orbitofrontal, and right pars triangularis in the discovery cohort. Group differences were tested using HC3-robust linear models with age and sex included as covariates, with two-sided inference and FDR correction across regions. All three parcels showed lower regional meanMS in DRE than in HC (q < 0.05), consistent with focal MSN weakening in limbic/orbitofrontal and frontal territories. Significance symbols: * q < 0.05, ** q < 0.01, *** q < 0.001; ns, not significant.

**Supplementary Figure 7A**

**Spatial correlations between gray-matter atrophy and neurotransmitter maps in the validation cohort.**

**
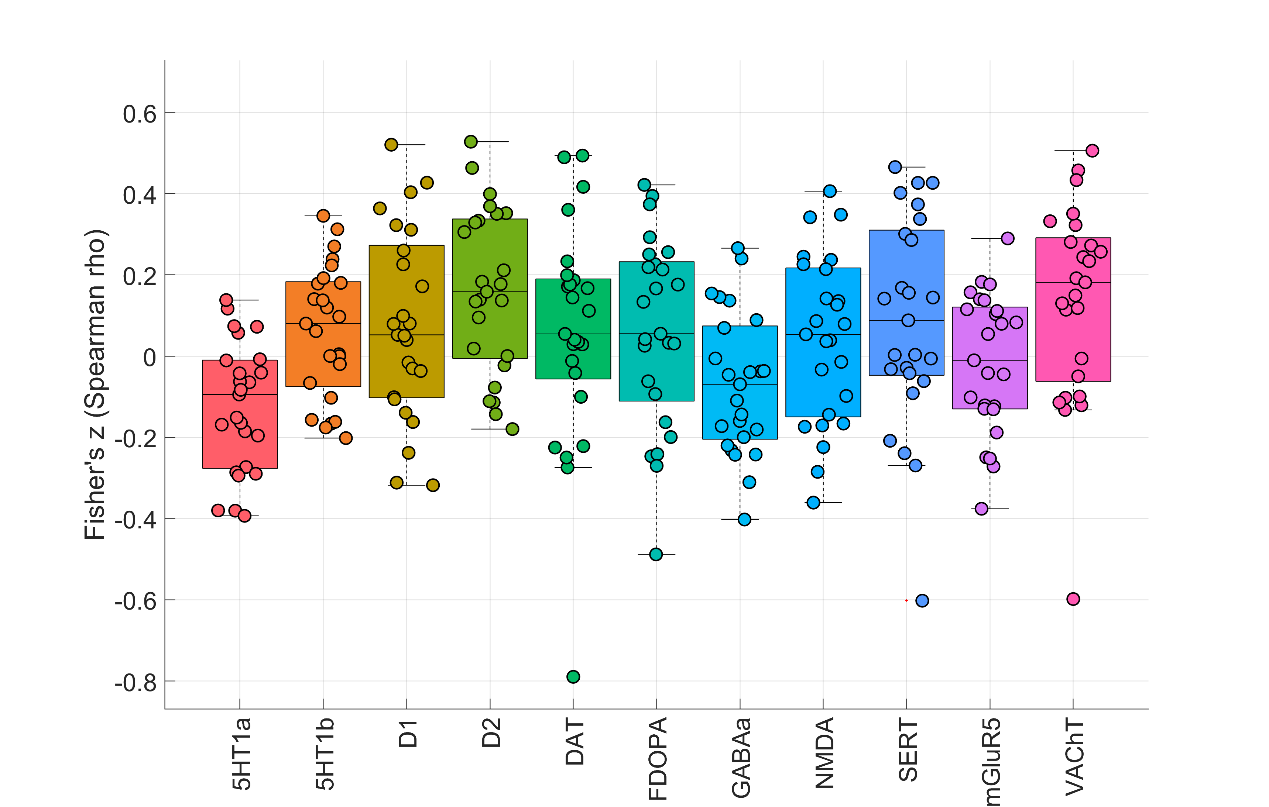
**

Boxplots depict Fisher’s z-transformed Spearman correlation coefficients between the DRE vs HC regional gray-matter atrophy pattern and reference PET/SPECT neurotransmitter maps in the validation dataset. Asterisks (*) denote associations surviving BH–FDR correction (q < 0.05). No neurotransmitter association survived BH–FDR correction in the validation dataset.

**Supplementary Figure 7B**

**Spatial correlations between gray-matter atrophy and cell-type/mitochondrial maps in the validation cohort.**

**
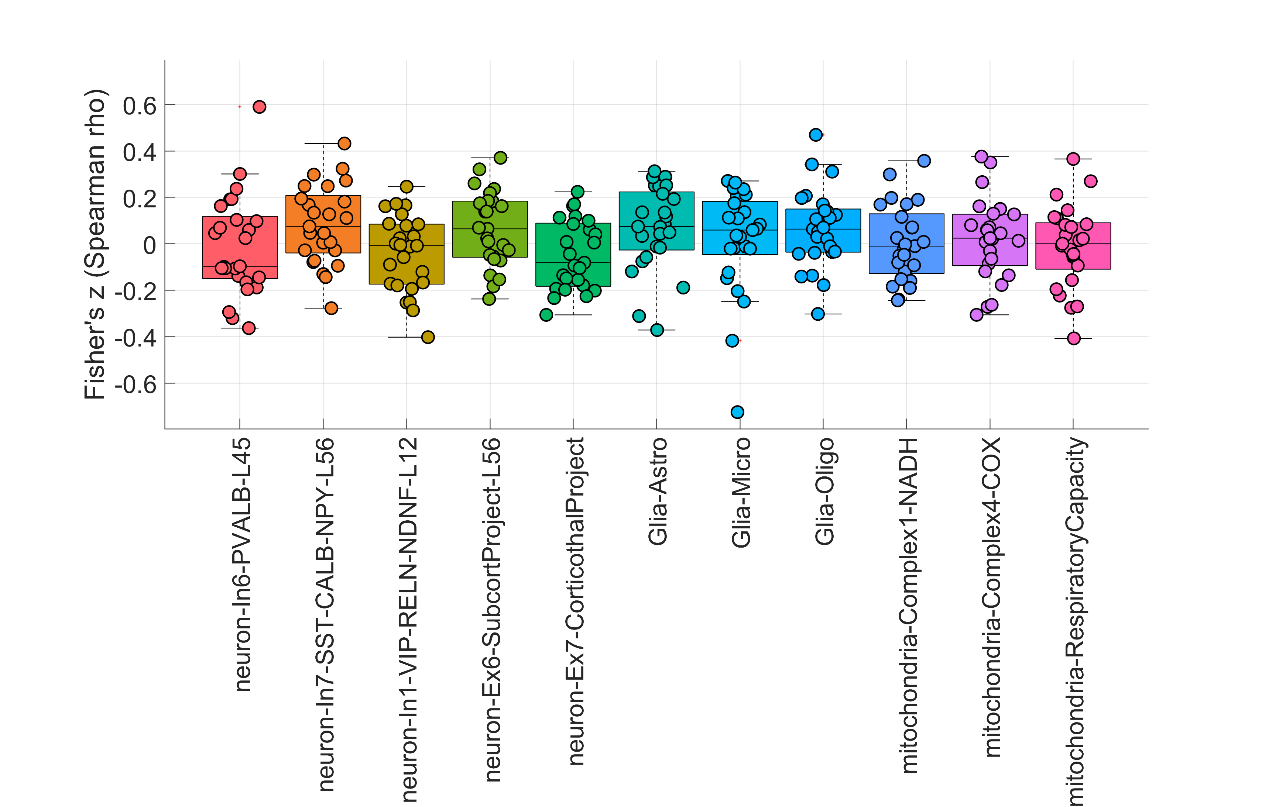
**

Boxplots depict Fisher’s z-transformed Spearman correlation coefficients between the DRE vs HC regional gray-matter atrophy pattern and reference cell-type transcriptional and mitochondrial maps in the validation dataset. Asterisks (*) denote associations surviving BH–FDR correction (q < 0.05). No cell-type or mitochondrial association survived BH–FDR correction in the validation dataset.

**Supplementary Figure 8**

**Spatial correlations between gray-matter atrophy and neurotransmitter maps in the discovery cohort (TLE vs HC)**


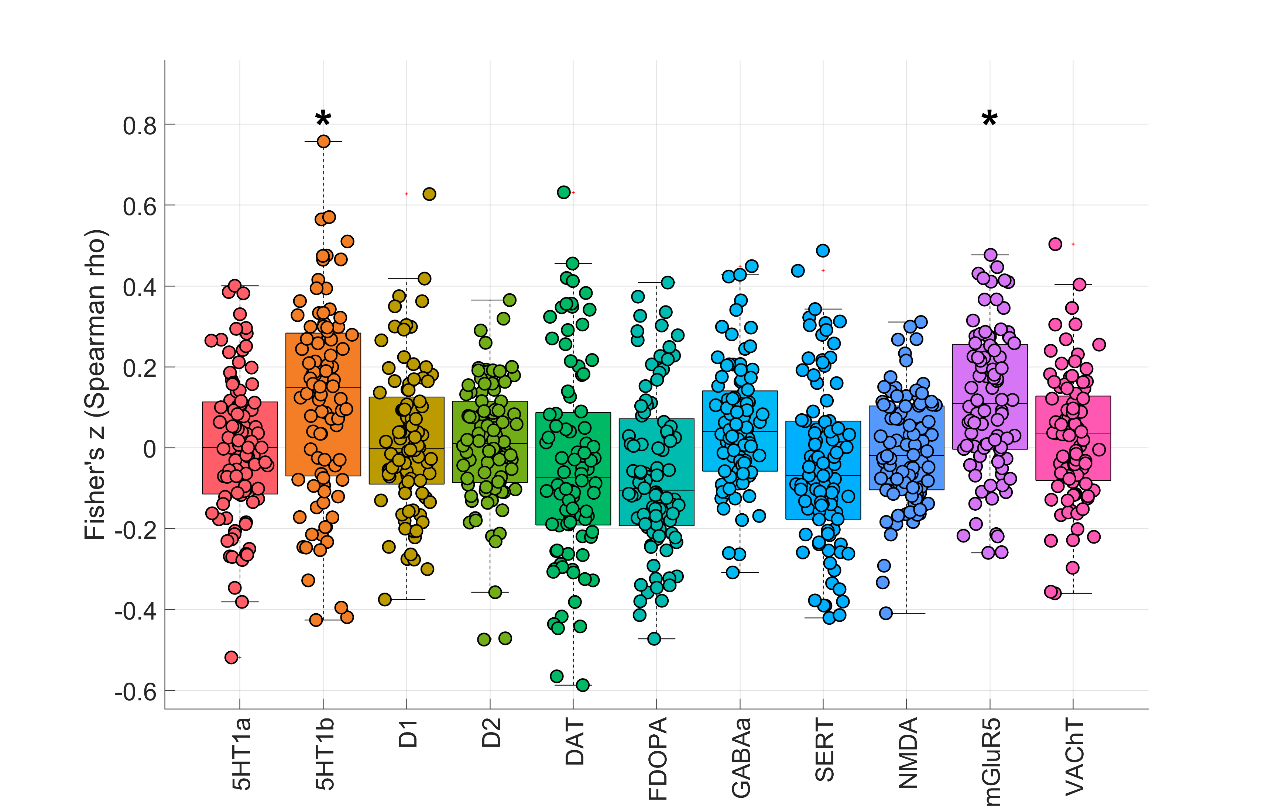


Boxplots depict Fisher’s z-transformed Spearman correlation coefficients between the TLE vs HC regional gray-matter atrophy pattern and reference PET/SPECT neurotransmitter maps in the discovery dataset. Asterisks denote associations surviving BH–FDR correction (q < 0.05). The atrophy pattern showed FDR-significant positive correlations with 5-HT1b and mGluR5, whereas correlations with the remaining neurotransmitter systems did not survive FDR correction.

**Supplementary Figure 9**

**Spatial correlations between gray-matter atrophy and neurotransmitter maps in the discovery cohort (left TLE vs HC)**


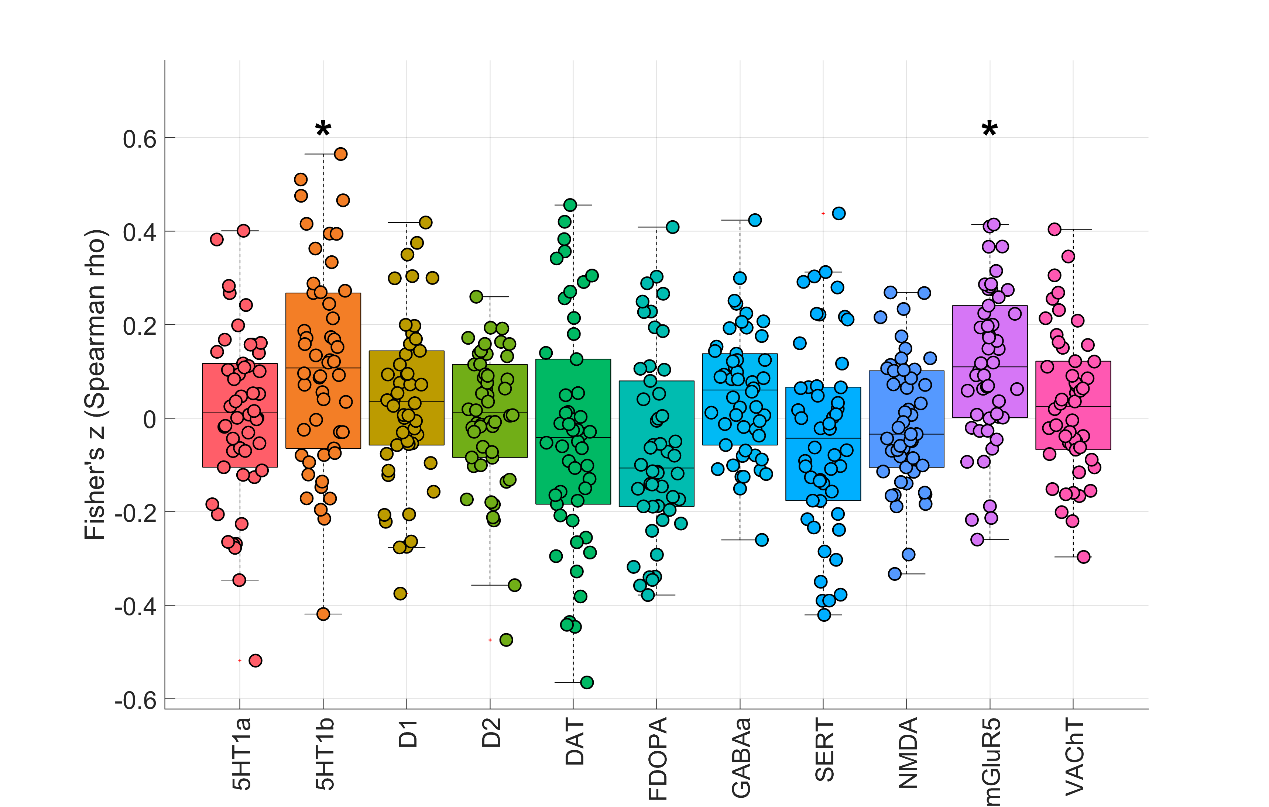


Boxplots depict Fisher’s z-transformed Spearman correlation coefficients between the left TLE vs HC regional gray-matter atrophy pattern and reference PET/SPECT neurotransmitter maps in the discovery dataset. Asterisks denote associations surviving BH–FDR correction (q < 0.05). The atrophy pattern showed FDR-significant positive correlations with 5-HT1b and mGluR5, whereas correlations with the remaining neurotransmitter systems did not survive FDR correction.

**Supplementary Figure 10**

**Spatial correlations between gray-matter atrophy and neurotransmitter maps in the discovery cohort (right TLE vs HC)**

**
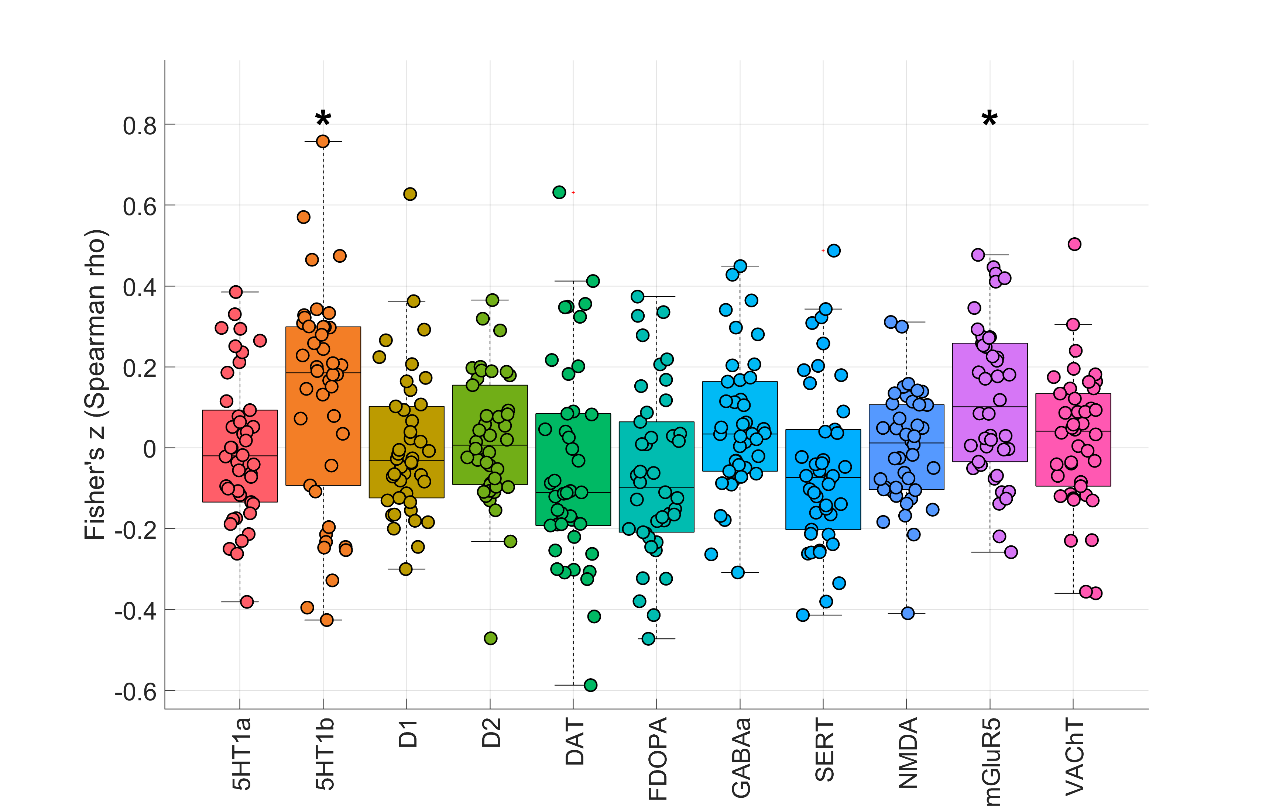
**

Boxplots depict Fisher’s z-transformed Spearman correlation coefficients between the left TLE vs HC regional gray-matter atrophy pattern and reference PET/SPECT neurotransmitter maps in the discovery dataset. Asterisks denote associations surviving BH–FDR correction (q < 0.05). The atrophy pattern showed FDR-significant positive correlations with 5-HT1b and mGluR5, whereas correlations with the remaining neurotransmitter systems did not survive FDR correction.

**Supplementary Figure 11**

**Spatial correlations between gray-matter atrophy and neurotransmitter maps in the discovery cohort (non TLE vs HC)
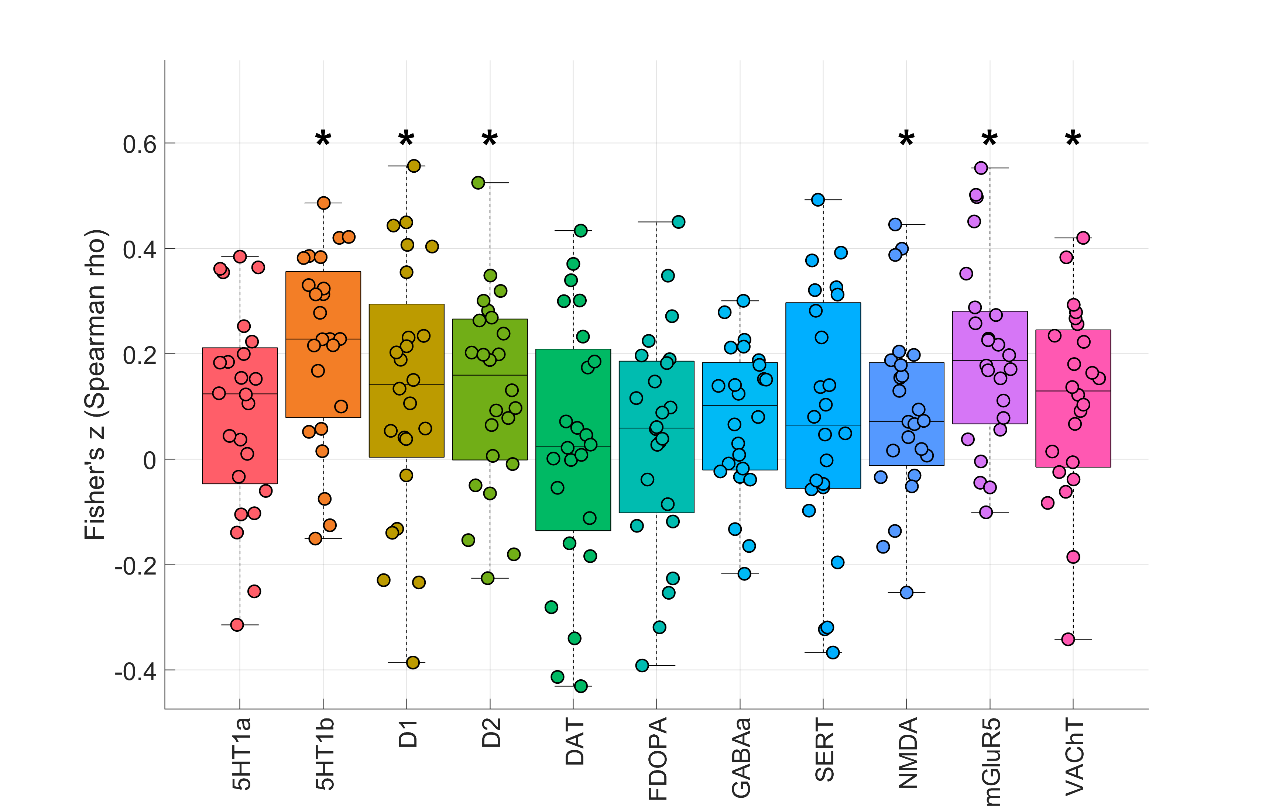
**

Boxplots depict Fisher’s z-transformed Spearman correlation coefficients between the non-TLE vs HC regional gray-matter atrophy pattern and reference PET/SPECT neurotransmitter maps in the discovery dataset. Asterisks denote associations surviving BH–FDR correction (q < 0.05). The atrophy pattern showed FDR-significant positive correlations with 5-HT1b, D1, D2, NMDA, mGluR5, and VAChT, whereas correlations with the remaining neurotransmitter systems did not survive FDR correction.

**Supplementary Figure 12**

**Spatial correlations between gray-matter atrophy and cell-type/mitochondrial maps in the discovery cohort (non TLE vs HC)**

**
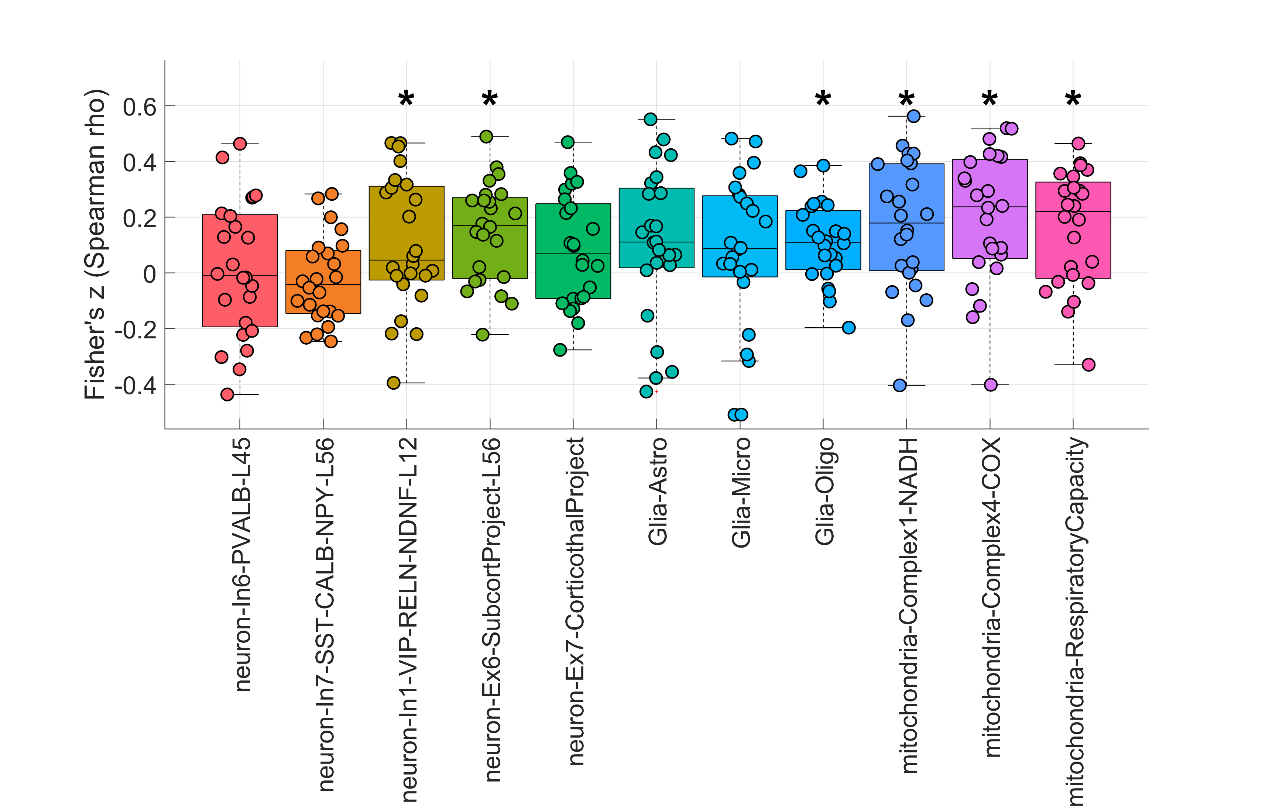
**

Boxplots depict Fisher’s z-transformed Spearman correlation coefficients between the non-TLE vs HC regional gray-matter atrophy pattern and reference maps of neuronal subtypes, glial classes, and mitochondrial systems in the discovery dataset. Asterisks denote associations surviving BH–FDR correction (q < 0.05). The atrophy pattern showed FDR-significant positive correlations with neuron-In1-VIP-RELN-NDNF-L12, neuron-Ex6-SubcortProject-L56, and Glia-Oligo, as well as with mitochondrial Complex I (NADH dehydrogenase), Complex IV (cytochrome c oxidase), and respiratory capacity, whereas correlations with the remaining neuronal and glial-class maps did not survive FDR correction.

**Supplementary Table 5**

| **Neurotransmitter receptor/transporter distribution map** | | | | | | | | | | | | | |
| --- | --- | --- | --- | --- | --- | --- | --- | --- | --- | --- | --- | --- | --- |
|  |  | **5HT1a** | **5HT1b** | **D1** | **D2** | **DAT** | **FDOPA** | **GABAα** | **SERT** | **NMDA** | **mGluR5** | **VAChT** |
| DRE vs HC | Fisher z | 0.104 | 0.510 | 0.179 | 0.177 | -0.070 | -0.159 | 0.211 | -0.034 | 0.079 | 0.506 | 0.199 |
|  | FDR-p | 0.82 | 0.03 | 0.82 | 0.82 | 0.82 | 0.82 | 0.82 | 0.89 | 0.82 | 0.04 | 0.82 |

**Spatial correspondence between group-wise GM atrophy and neurotransmitter in the discovery cohort (DRE vs HC) using Moran spectral randomization (BrainSpace)**

Entries show the Fisher z-transformed Spearman correlations between the group-wise GM atrophy map (DRE vs HC) and each reference template (neurotransmitter receptor/transporter). P-values are FDR-adjusted.
